# Supplementary material for: Experiencing a significant win and its sociodemographic and motivational predictors: A comparative analysis of pure-chance gamblers from Poland and France
Source: PLoS One. 2022 Nov 21;17(11):e0277972. doi: 10.1371/journal.pone.0277972 (PMC9678313; doi:10.1371/journal.pone.0277972)
Supplement: S1 Table — (XLSX) [file pone.0277972.s001.xlsx]

## Sheet: Variables comparison
		Country
		FR		PL
Variable	Category	n	%	n	%	χ2	df	p
Age of gambling onset	<= 19	2876	0.506	1585	0.504	0.0255211	1	0.873075
	20+	2807	0.494	1558	0.496
Significant win in environment	Yes	1405	0.25	1201	0.382	168.256	1	< .001
	No	4214	0.75	1942	0.618
Type of PCG preffered	Lottery	3005	0.528	1875	0.597	38.5723	1	< .001
	Other	2687	0.472	1268	0.403
Spending on gambling	1Q	1748	0.307	838	0.267	124.658	2	< .001
	2-3Q	2595	0.456	1802	0.573
	4Q	1349	0.237	503	0.16
Frequency of gambling	At least once a week	1951	0.343	814	0.259	66.0915	1	< .001
	Regularly, but less than once a week	3741	0.657	2329	0.741
Lotteries	No	1354	0.238	559	0.178	43.002	1	< .001
	Oui	4338	0.762	2584	0.822
Scratch cards	No	1732	0.304	965	0.307	0.072	1	0.789
	Oui	3960	0.696	2178	0.693
Horse races	No	5183	0.911	3069	0.976	142.589	1	< .001
	Oui	509	0.089	74	0.024
Sport betting	No	5243	0.921	2866	0.912	2.297	1	0.13
	Oui	449	0.079	277	0.088
Poker	No	5438	0.955	3032	0.965	4.429	1	0.035
	Oui	254	0.045	111	0.035
Slot machines	No	4989	0.876	2838	0.903	14.032	1	< .001
	Oui	703	0.124	305	0.097
Other cassino games	No	5382	0.946	3007	0.957	5.291	1	0.021
	Oui	310	0.054	136	0.043
Other games	No	5560	0.977	3140	0.999	66.539	1	< .001
	Oui	132	0.023	3	0.001
Type of game	Tirage	3005	0.528	1875	0.597	52.937	3	< .001
	Grattage	2374	0.417	1171	0.373
	Slot machines	226	0.04	73	0.023
	Autres JC	87	0.015	24	0.008
